# Supplementary material for: Development of a catalytically green route from diverse lignocellulosic biomasses to high-density cycloalkanes for jet fuels
Source: Royal Society of Chemistry journal article supplement (doi:10.1039/c5cy01623a), 2016-01-01
Supplement: c5cy01623a1.pdf [file c5cy01623a1.pdf]

Supplementary information

**Development of a catalytically green route from diverse lignocellulosic  
biomasses to high-density cycloalkanes for jet fuels**

Xuesong Zhang, Hanwu Lei,\* Lei Zhu, Moriko Qian, J. C. Chan, Xiaolu Zhu, Yupeng Liu, Gayatri  
Yadavalli, Di Yan, Lu Wang, Quan Bu, Yi Wei, Joan Wu, and Shulin Chen

**Table S1** Proximate and elemental analyses of diverse lignocellulosic biomasses

| Characteristics                 | Hybrid poplar<br>sawdust | Loblolly pine<br>sawdust | Douglas fir<br>sawdust pellets |
|---------------------------------|--------------------------|--------------------------|--------------------------------|
| <i>Proximate analysis (wt%)</i> |                          |                          |                                |
| Moisture                        | 5.34                     | 5.50                     | 4.82                           |
| Volatile matter                 | 75.87                    | 78.23                    | 76.08                          |
| Fixed carbon                    | 17.36                    | 15.74                    | 18.89                          |
| Ash                             | 1.43                     | 0.53                     | 0.21                           |
| <i>Elemental analysis (wt%)</i> |                          |                          |                                |
| Carbon                          | 50.20                    | 49.30                    | 47.90                          |
| Hydrogen                        | 6.02                     | 6.02                     | 6.55                           |
| Nitrogen                        | 0.59                     | 0.06                     | 0.08                           |
| Oxygen <sup>a</sup>             | 43.19                    | 44.62                    | 45.57                          |

<sup>a</sup>by difference

**Table S2** Experimental design and product yield distribution of hybrid poplar

| Run <sup>a</sup> | Catalytic<br>Temperature<br>(°C) | Catalyst to<br>biomass ratio | Yield (wt.%) |       |       |      |
|------------------|----------------------------------|------------------------------|--------------|-------|-------|------|
|                  |                                  |                              | Organics     | Gas   | Char  | Coke |
| H-1              | 300                              | 0.15                         | 18.65        | 40.54 | 22.59 | 2.68 |
| H-2              | 300                              | 0.35                         | 17.38        | 42.87 | 22.22 | 3.23 |
| H-3              | 450                              | 0.15                         | 15.65        | 48.84 | 21.52 | 1.27 |
| H-4              | 450                              | 0.35                         | 14.44        | 50.34 | 22.88 | 2.25 |
| H-5              | 269                              | 0.25                         | 19.21        | 42.22 | 22.59 | 3.57 |
| H-6              | 375                              | 0.25                         | 17.20        | 44.82 | 22.54 | 2.00 |
| H-7              | 375                              | 0.25                         | 17.43        | 45.01 | 23.17 | 2.03 |
| H-8              | 375                              | 0.25                         | 17.53        | 45.21 | 22.34 | 2.12 |
| H-9              | 375                              | 0.25                         | 17.11        | 44.76 | 22.56 | 1.98 |
| H-10             | 375                              | 0.25                         | 17.33        | 44.88 | 21.89 | 2.23 |
| H-11             | 481                              | 0.25                         | 15.46        | 48.74 | 21.98 | 1.54 |
| H-12             | 375                              | 0.11                         | 18.23        | 43.21 | 22.20 | 1.89 |
| H-13             | 375                              | 0.39                         | 16.21        | 46.02 | 22.91 | 2.43 |
| H-14             | 500                              | 0.25                         | 14.87        | 50.05 | 23.01 | 1.27 |
| H-15             | 375                              | 0.50                         | 15.89        | 47.23 | 22.63 | 2.98 |
| H-16             | -                                | -                            | 22.07        | 39.20 | 22.52 | -    |

<sup>a</sup> H-1 to H-13 was conducted based on central composite design; H-14 and H-15 were added as the controls; H-16 is the control in the absence of catalyst.

**Table S3** Experimental design and product yield distribution of loblolly pine

| Run <sup>a</sup> | Catalytic<br>Temperature<br>(°C) | Catalyst to<br>biomass ratio | Yield (wt.%) |       |       |      |
|------------------|----------------------------------|------------------------------|--------------|-------|-------|------|
|                  |                                  |                              | Organics     | Gas   | Char  | Coke |
| L-1              | 300                              | 0.15                         | 17.78        | 41.38 | 20.20 | 2.25 |
| L-2              | 300                              | 0.35                         | 16.99        | 44.02 | 20.11 | 3.99 |
| L-3              | 450                              | 0.15                         | 15.01        | 47.54 | 20.10 | 1.18 |
| L-4              | 450                              | 0.35                         | 13.56        | 52.02 | 19.98 | 1.93 |
| L-5              | 269                              | 0.25                         | 18.23        | 42.22 | 19.65 | 3.23 |
| L-6              | 375                              | 0.25                         | 16.67        | 46.23 | 19.88 | 2.44 |
| L-7              | 375                              | 0.25                         | 16.74        | 47.02 | 20.22 | 2.45 |
| L-8              | 375                              | 0.25                         | 16.23        | 46.37 | 20.34 | 2.66 |
| L-9              | 375                              | 0.25                         | 17.05        | 46.43 | 19.55 | 2.22 |
| L-10             | 375                              | 0.25                         | 16.22        | 46.82 | 19.43 | 2.54 |
| L-11             | 481                              | 0.25                         | 14.23        | 50.12 | 20.22 | 1.54 |
| L-12             | 375                              | 0.11                         | 17.43        | 44.45 | 20.45 | 1.74 |
| L-13             | 375                              | 0.39                         | 16.00        | 47.82 | 20.24 | 2.72 |
| L-14             | 500                              | 0.25                         | 13.89        | 52.13 | 20.53 | 1.25 |
| L-15             | 375                              | 0.50                         | 16.01        | 49.45 | 19.79 | 3.04 |
| L-16             | -                                | -                            | 21.02        | 40.98 | 19.34 | -    |

<sup>a</sup> L-1 to L-13 was conducted based on central composite design; L-14 and L-15 were added as the controls; L-16 is the control in the absence of catalyst.

**Table S4** Experimental design and product yield distribution of Douglas fir

| Run <sup>a</sup> | Catalytic Temperature (°C) | Catalyst to biomass ratio | Yield (wt.%) |       |       |      |
|------------------|----------------------------|---------------------------|--------------|-------|-------|------|
|                  |                            |                           | Organics     | Gas   | Char  | Coke |
| D-1              | 300                        | 0.15                      | 17.88        | 39.45 | 22.25 | 3.03 |
| D-2              | 300                        | 0.35                      | 17.11        | 40.25 | 21.50 | 3.98 |
| D-3              | 450                        | 0.15                      | 15.48        | 46.20 | 21.85 | 2.02 |
| D-4              | 450                        | 0.35                      | 13.88        | 49.66 | 21.63 | 2.65 |
| D-5              | 269                        | 0.25                      | 18.67        | 40.20 | 21.78 | 4.02 |
| D-6              | 375                        | 0.25                      | 16.88        | 44.02 | 22.54 | 2.82 |
| D-7              | 375                        | 0.25                      | 16.77        | 44.34 | 22.78 | 2.94 |
| D-8              | 375                        | 0.25                      | 16.96        | 44.21 | 22.07 | 2.78 |
| D-9              | 375                        | 0.25                      | 16.54        | 44.02 | 21.74 | 3.02 |
| D-10             | 375                        | 0.25                      | 16.82        | 44.01 | 21.56 | 2.98 |
| D-11             | 481                        | 0.25                      | 14.65        | 47.89 | 22.21 | 2.44 |
| D-12             | 375                        | 0.11                      | 18.00        | 42.88 | 21.85 | 2.71 |
| D-13             | 375                        | 0.39                      | 15.99        | 44.23 | 21.90 | 3.55 |
| D-14             | 500                        | 0.25                      | 14.02        | 49.11 | 22.05 | 1.95 |
| D-15             | 375                        | 0.50                      | 16.32        | 45.56 | 22.12 | 3.90 |
| D-16             | -                          | -                         | 20.88        | 38.18 | 21.25 | -    |

<sup>a</sup> D-1 to D-13 was conducted based on central composite design; D-14 and D-15 were added as the controls; D-16 is the control in the absence of catalyst.

**Table S5** Proportion of cellulose, hemicellulose and lignin (as% dry weight) in various biomass species

|               | Hybrid poplar<br>sawdust | Loblolly pine sawdust | Douglas fir<br>sawdust pellets |
|---------------|--------------------------|-----------------------|--------------------------------|
| Cellulose     | 49                       | 42                    | 44                             |
| Hemicellulose | 22                       | 21                    | 21                             |
| Lignin        | 23                       | 26                    | 32                             |

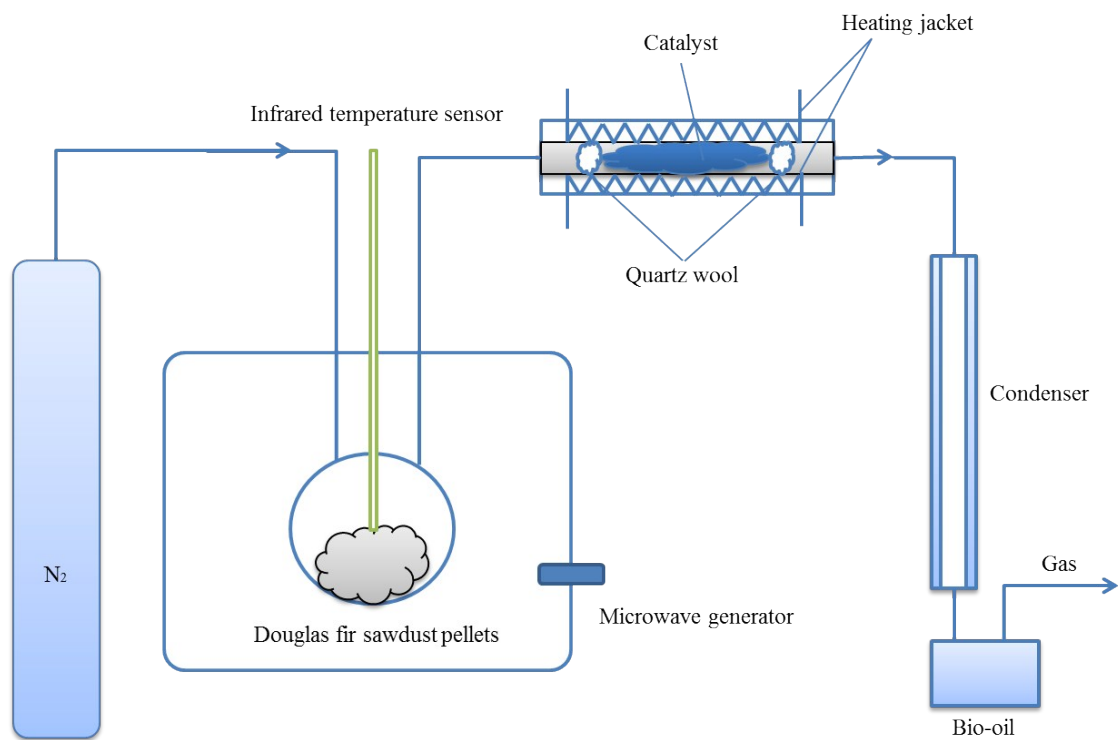

**Fig. S1** The schematic diagram of the microwave-assisted pyrolysis system integrated with catalysis process

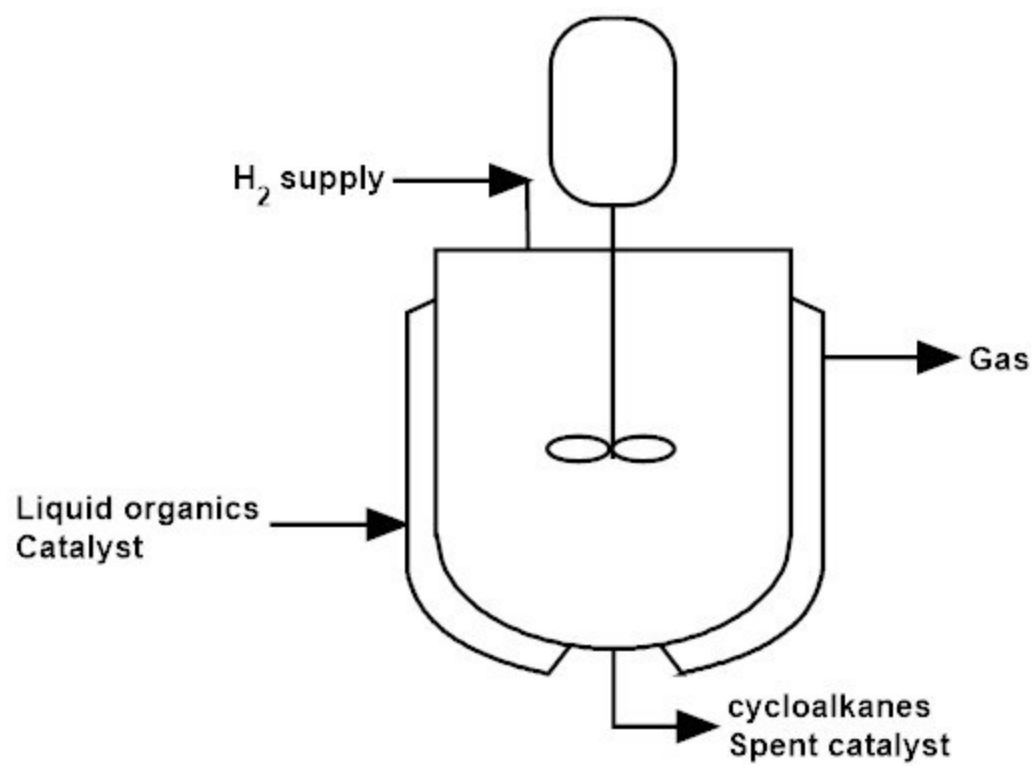

**Fig. S2** The schematic overview of the hydrogenation process set-up



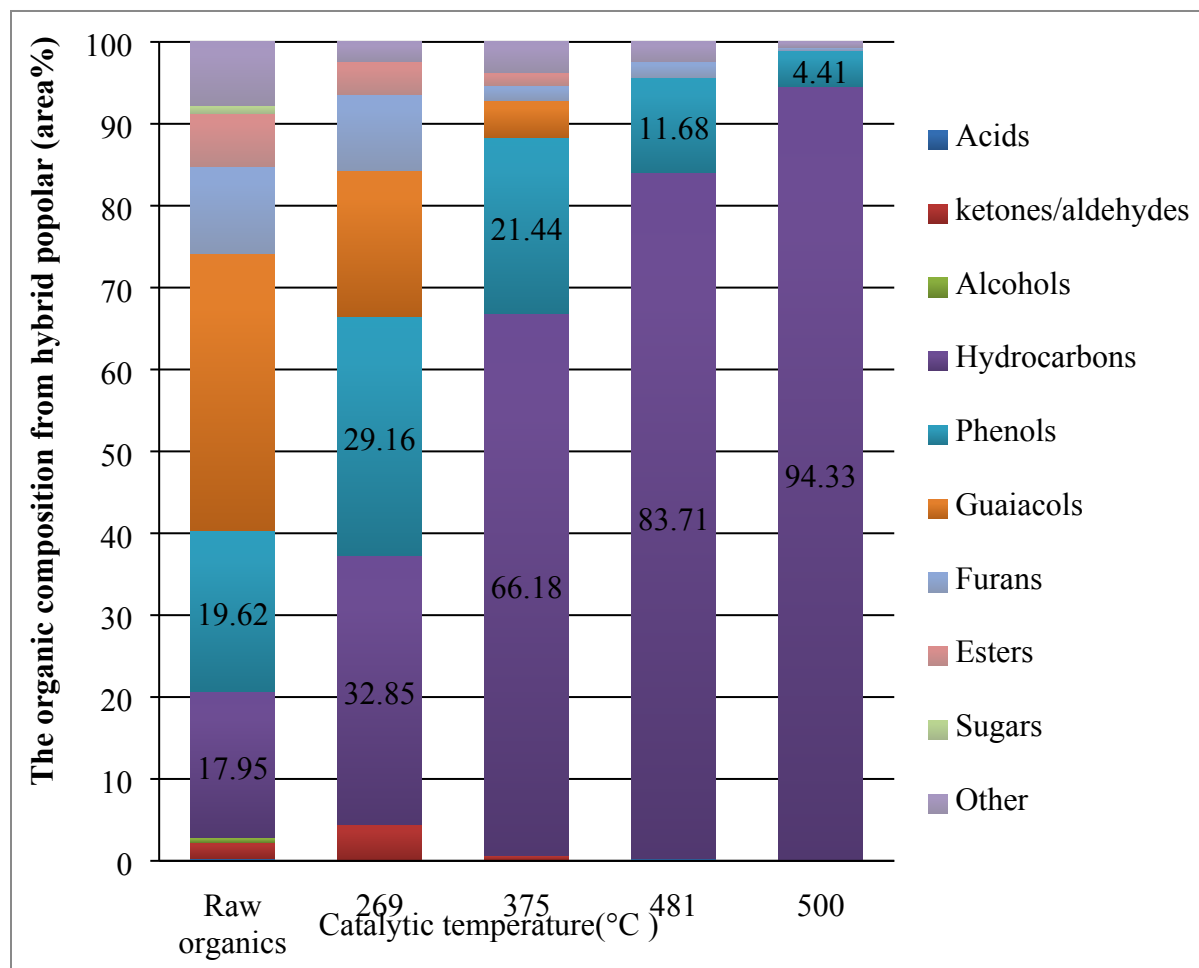

**Fig. S3** The organic composition from hybrid poplar as a function of catalytic temperature at the same biomass to catalyst ratio (0.25).

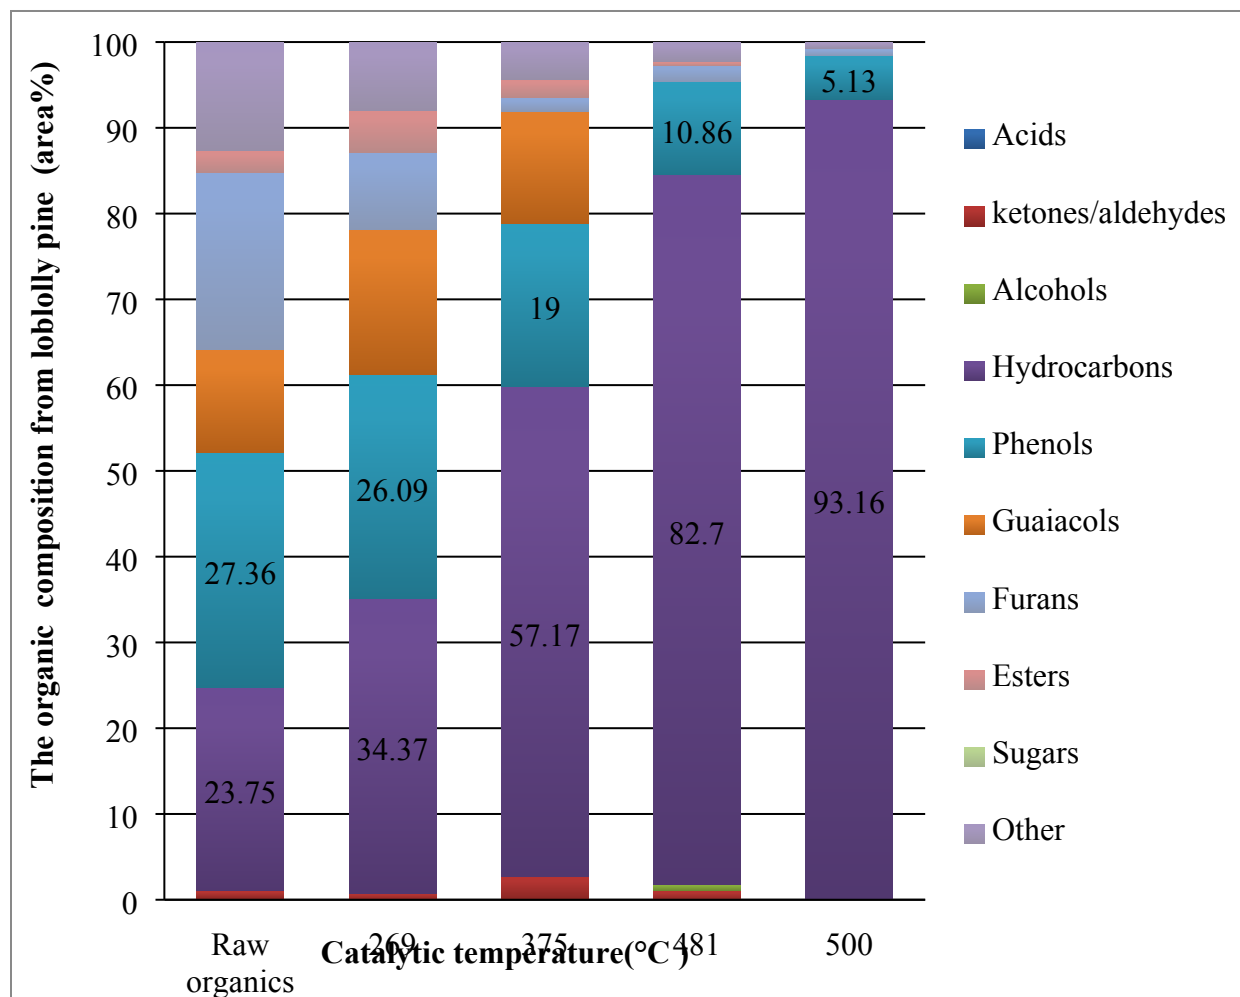

**Fig. S4** The organic composition from loblolly pine as a function of catalytic temperature at the same biomass to catalyst ratio (0.25).

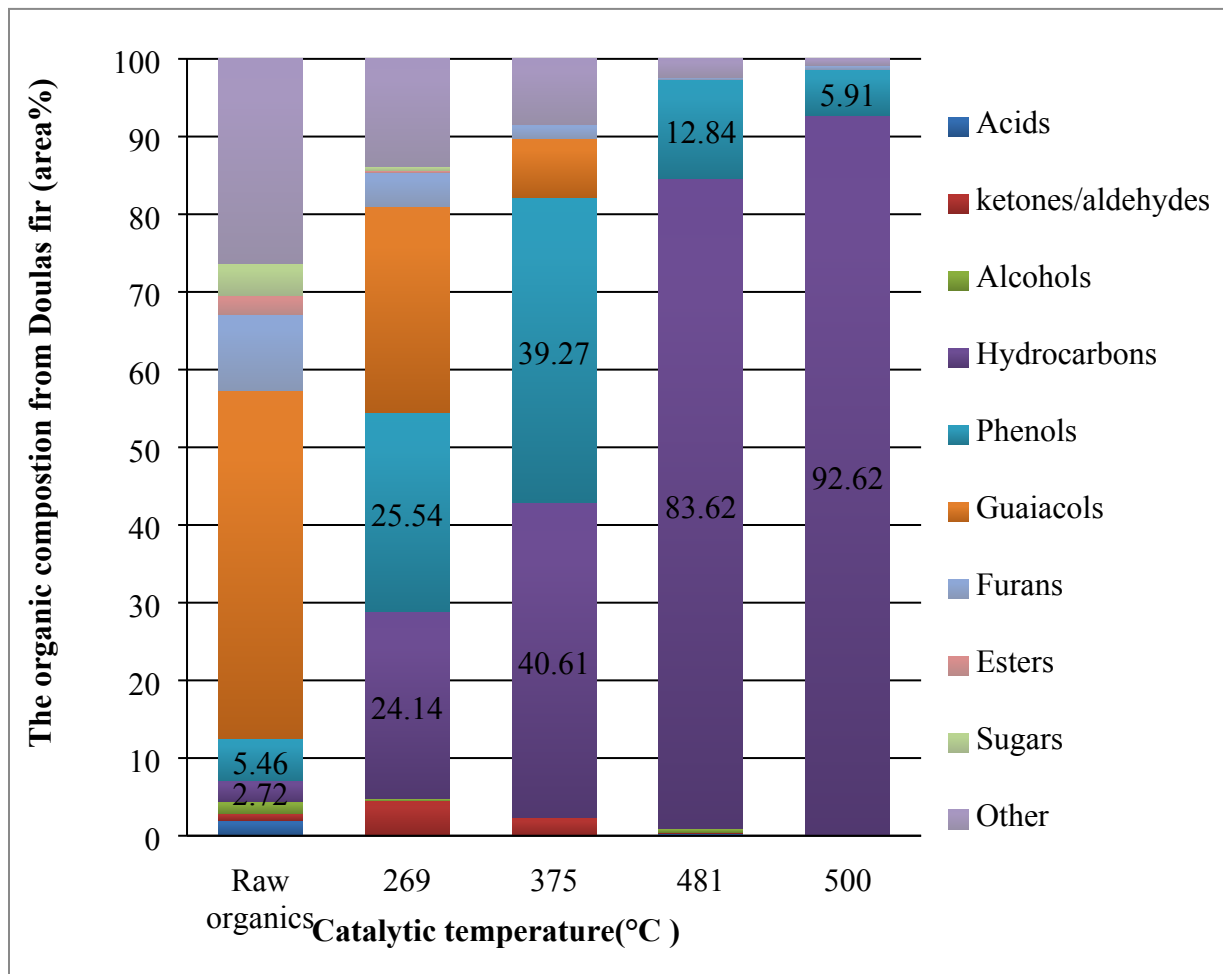

**Fig. S5** The organic composition from Douglas fir as a function of catalytic temperature at the same biomass to catalyst ratio (0.25).
